# Supplementary material for: MnO2@Ce6-loaded mesenchymal stem cells as an “oxygen-laden guided-missile” for the enhanced photodynamic therapy on lung cancer
Source: Royal Society of Chemistry journal article supplement (doi:10.1039/c9nr07947e), 2019-12-20
Supplement: c9nr07947e1.pdf [file c9nr07947e1.pdf]

**MnO<sub>2</sub>@Ce6 loaded mesenchymal stem cells as “oxygen-laden  
guided-missile” for enhanced photodynamic therapy on lung cancer**

Wen Cao, Bin Liu, Fangfang Xia, Meng Duan, Yuping Hong, Jiaqi Niu, Lirui Wang,  
Yanlei Liu, Can Li, Daxiang Cui

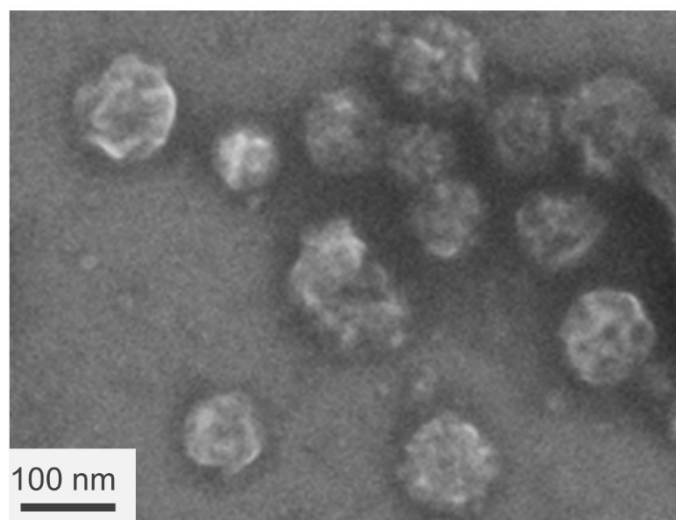

Fig.S1 SEM images of MnO<sub>2</sub>@Ce6 NPs.

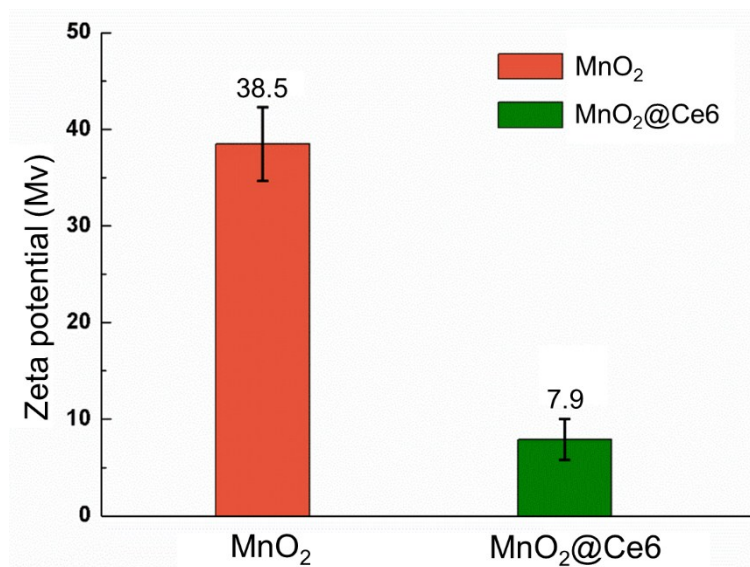

Fig.S2 zeta potential of MnO<sub>2</sub> and MnO<sub>2</sub>@Ce6.

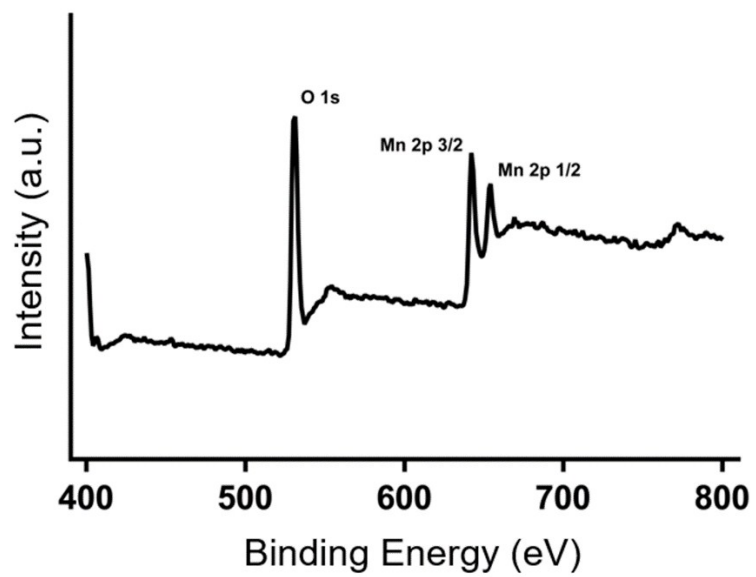

Fig. S3 XPS spectra of MnO<sub>2</sub>

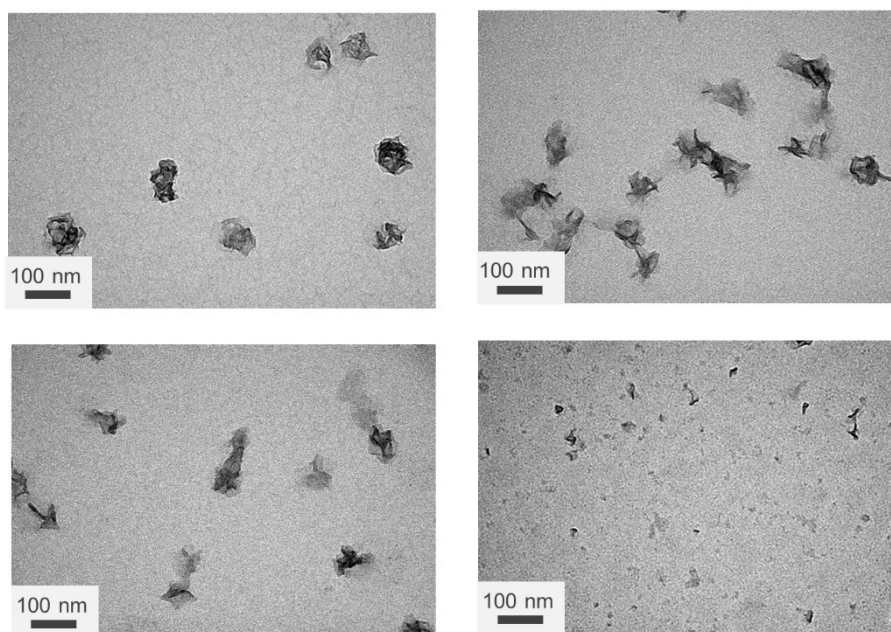

Fig.S4 TEM images of MnO<sub>2</sub>@Ce6 degradation process in 100μM H<sub>2</sub>O<sub>2</sub>

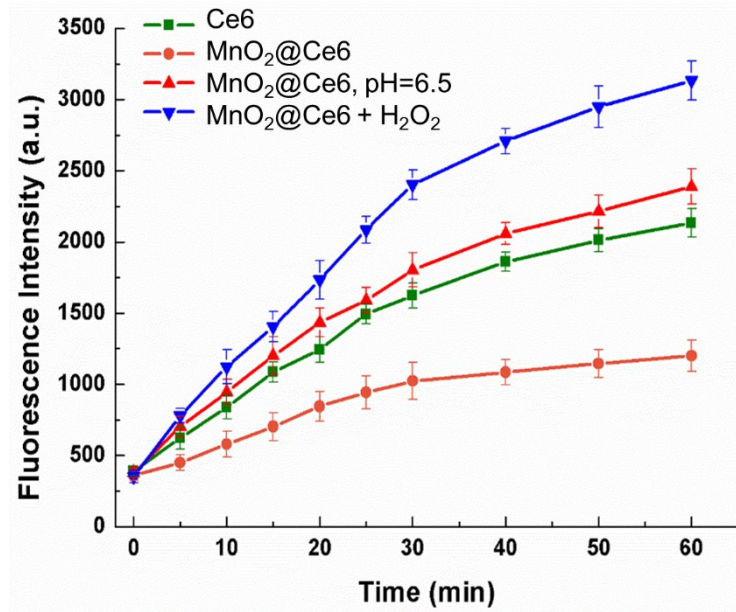

Fig.S5 Time-course singlet oxygen release of Ce6 and MnO<sub>2</sub>@Ce6 NPs in different conditions.

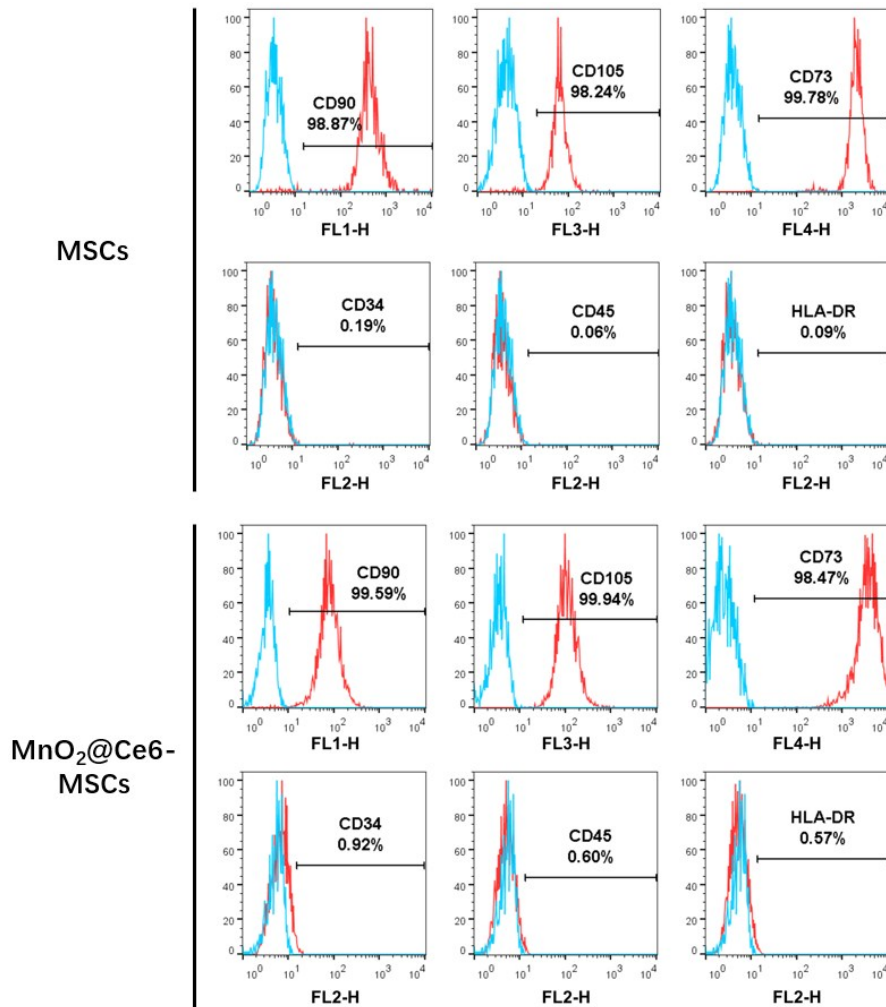

Fig.S6 Immunophenotype identification of MSCs before and after loading MnO<sub>2</sub>@Ce6.

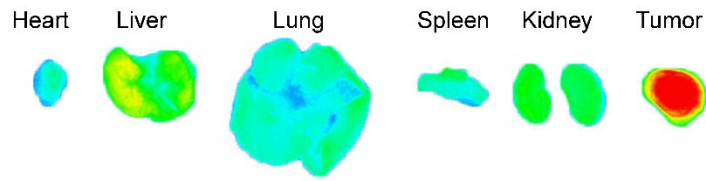

Fig. S7 Fluorescence images of excised organs and tumor at 24 h post-injection

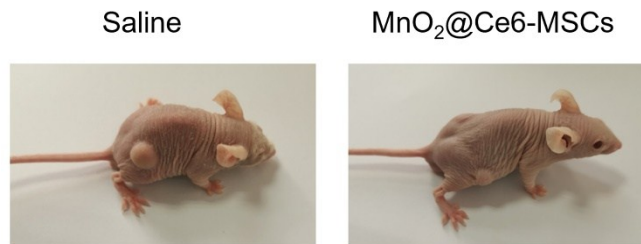

Fig. S8 Photographs of mice treated with saline and  $\text{MnO}_2@$ Ce6-MSCs after 14 days

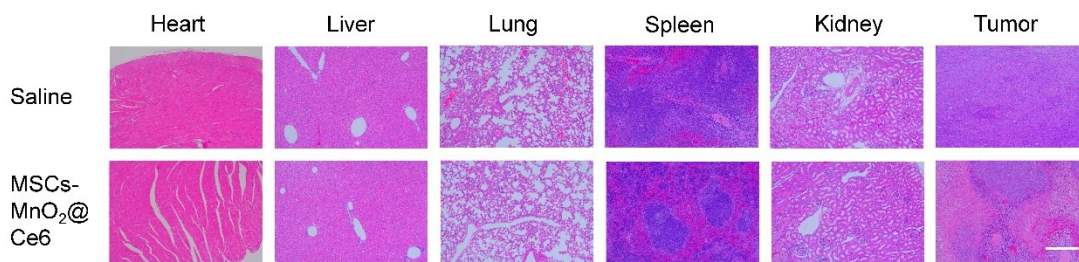

Fig.S9 H&E sections of main organs and tumor after treatment for 14 days  
(Scale bar: 200  $\mu\text{m}$ )
